# Supplementary material for: Fabrication of Cu–CuO–Fe2O3/Fe anti-sticky and superhydrophobic surfaces on an iron substrate with mechanical abrasion resistance and corrosion resistance
Source: Royal Society of Chemistry journal article supplement (doi:10.1039/c7nj00658f), 2017-01-01
Supplement: c7nj00658f1.pdf [file c7nj00658f1.pdf]

**Fabrication of Cu-CuO-Fe<sub>2</sub>O<sub>3</sub>/Fe anti-sticky and  
superhydrophobic surfaces on iron substrate with mechanical  
abrasion resistance and corrosion resistance**

Yuanyuan Cheng<sup>a</sup>, Shixiang Lu<sup>a\*</sup>, Wenguo Xu<sup>a\*</sup>, Hong Tao<sup>a</sup>

Submitted to *New Journal of Chemistry*

<sup>a</sup> School of Chemistry and Chemical Engineering, Beijing Institute of Technology, Beijing 100081, P.R. China.

\* Corresponding author, E-mail: [shixianglu@bit.edu.cn](mailto:shixianglu@bit.edu.cn) (Shixiang Lu); [xuwg60@bit.edu.cn](mailto:xuwg60@bit.edu.cn) (Wenguo Xu)

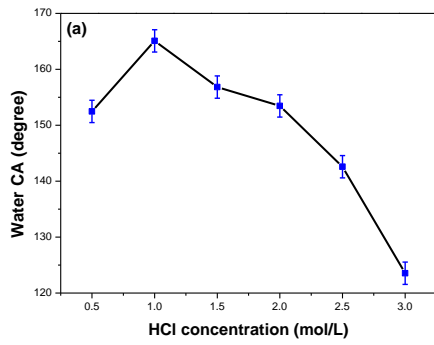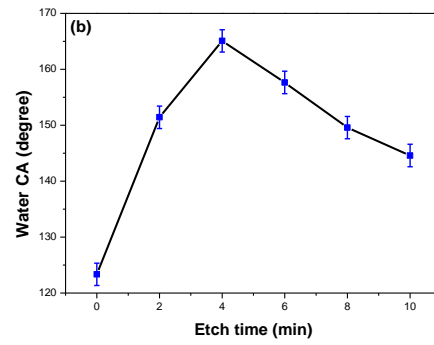

**Fig. S1.** Variation in WCAs of the samples with various HCl concentration (a) and etch time (b) with other conditions unchanged.

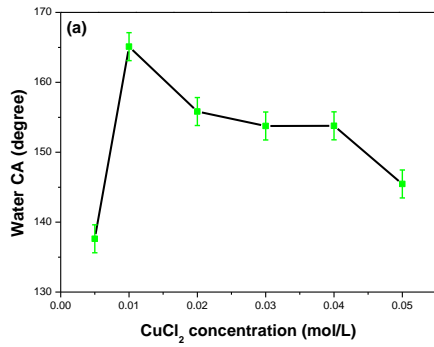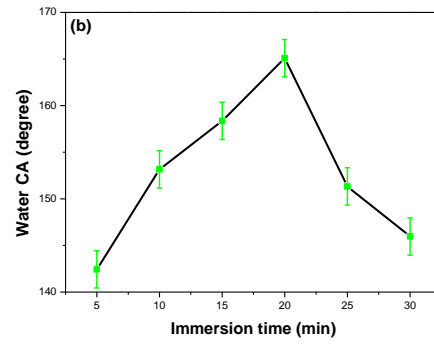

**Fig. S2.** Variation in WCAs of the samples with various CuCl<sub>2</sub> concentration (a) and immersion time (b) with other conditions unchanged.

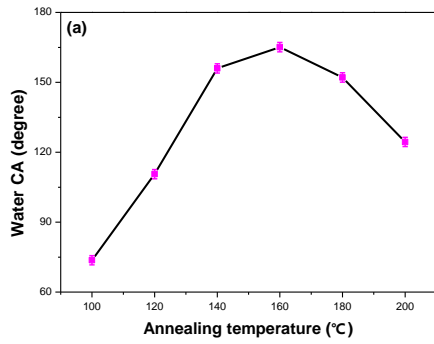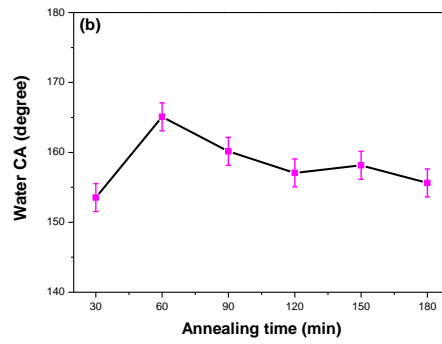

**Fig. S3.** Variation in WCAs of the samples at various annealing temperatures (a) and annealing time (b) with other conditions unchanged.

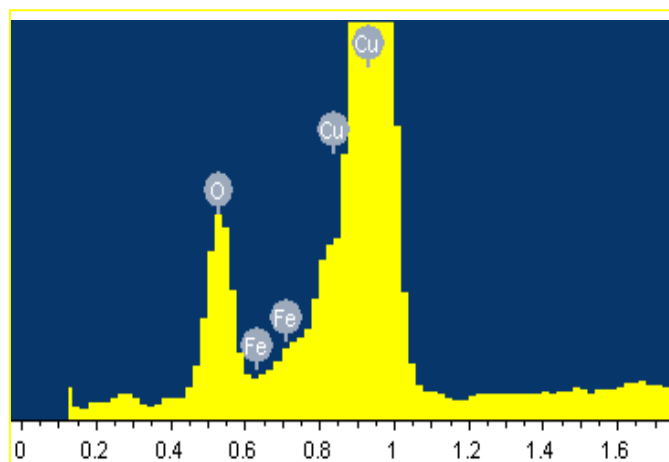

**Fig. S4.** EDS spectrum of the as-prepared superhydrophobic surface.
